# Supplementary material
Source: Elsevier journal article supplement (https://rcastoragev2.blob.core.windows.net/ccbb16131a3f6922113d385a54d1404a/mmc1.pdf)
Supplement: mmc1 [file mmc1.pdf]

## Supplementary webappendix

This webappendix formed part of the original submission and has been peer reviewed.  
We post it as supplied by the authors.

Supplement to: Beijer U, Wolf A, Fazel S. Prevalence of tuberculosis, hepatitis C virus, and HIV in homeless people: a systematic review and meta-analysis. *Lancet Infect Dis* 2012; **12**: 859–70.

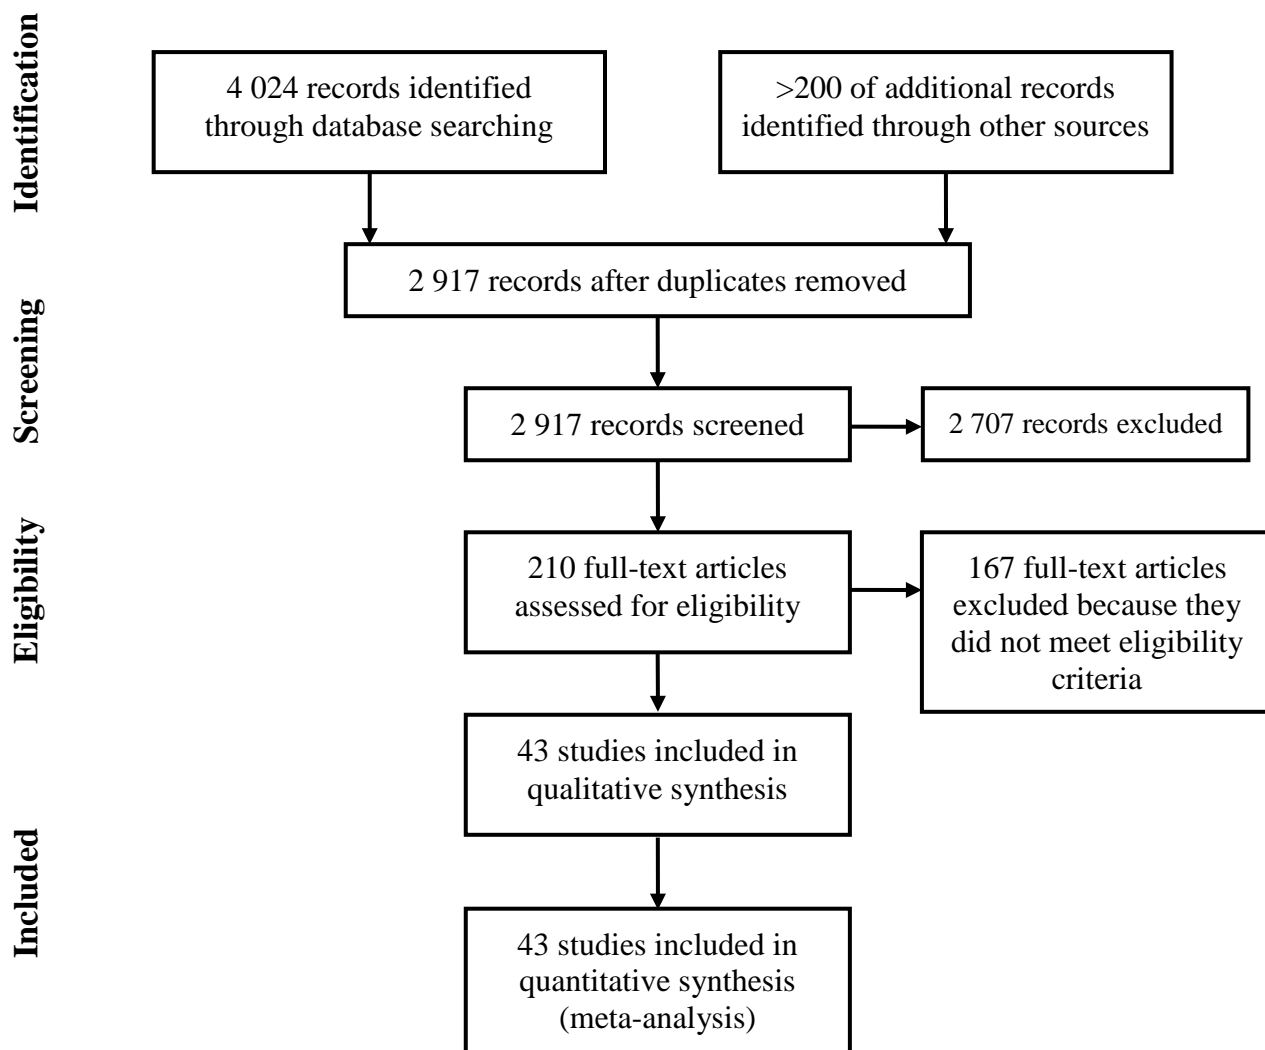

Flow-chart documenting the systematic search conducted to identify included studies

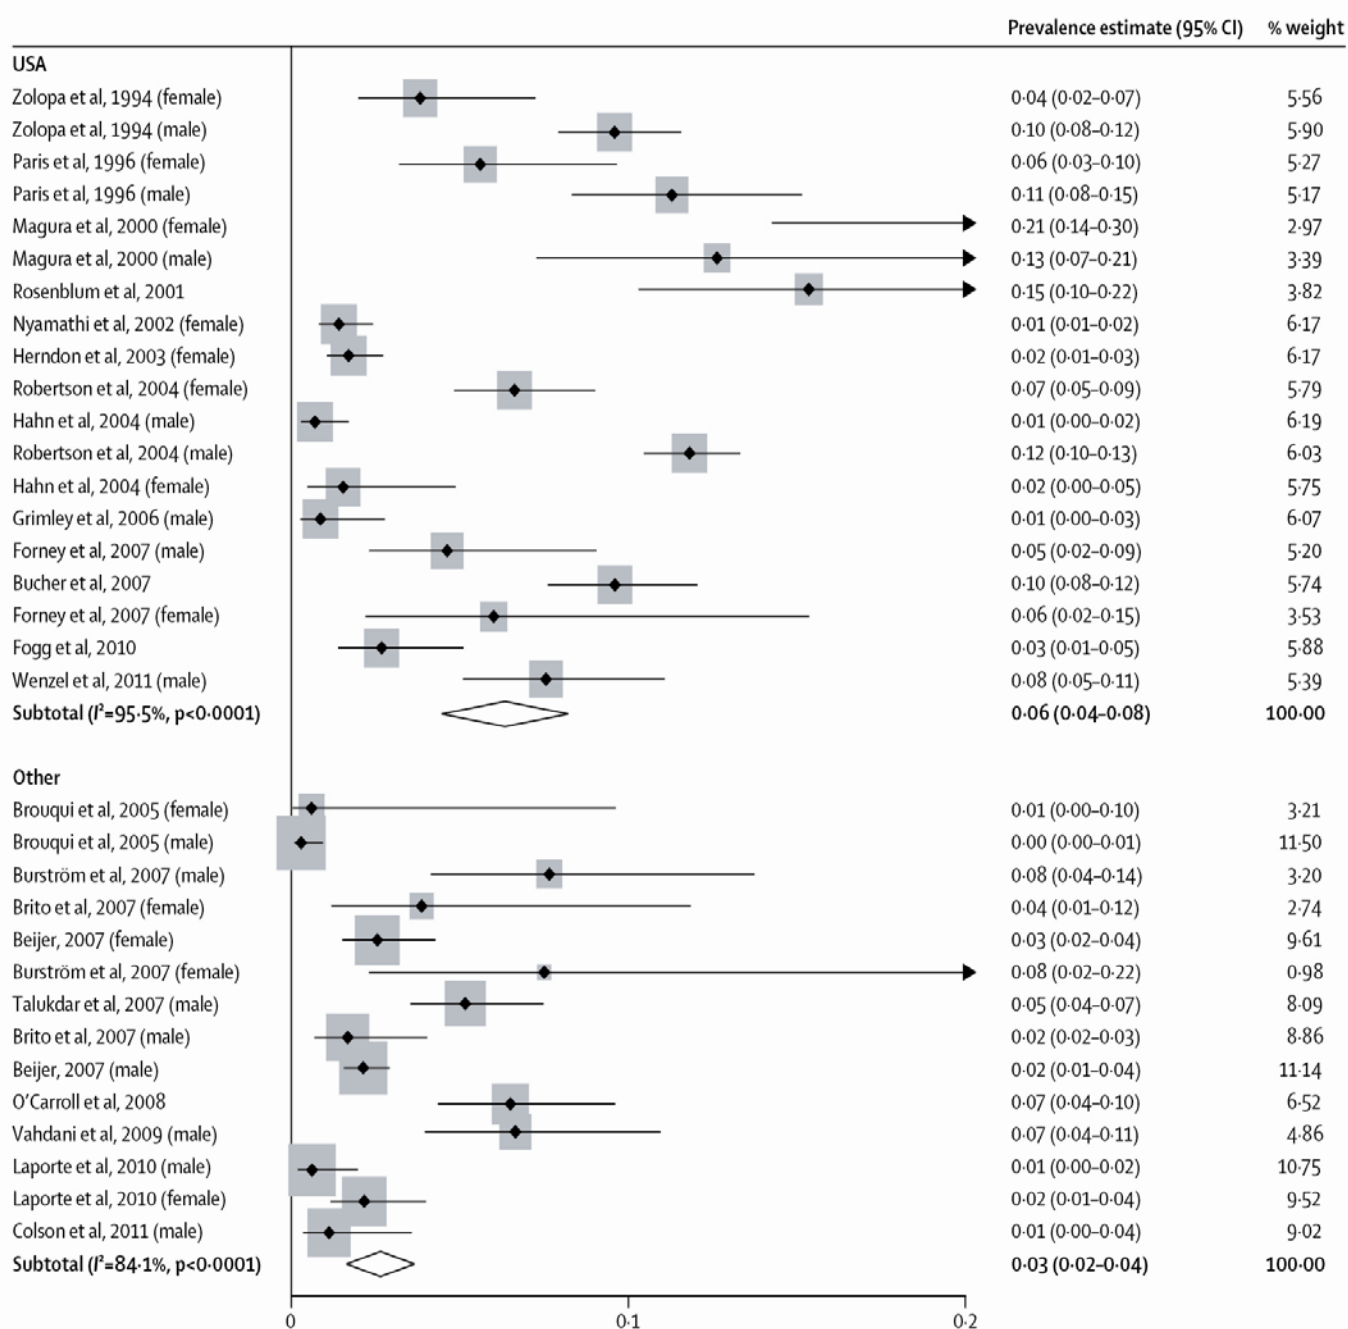

**Figure: Prevalence of HIV infection in homeless people in the USA compared with that in other countries**

Weights are from random effects analysis.
